# Supplementary material
Source: HighWire-hosted journal article supplement (https://jnm.snmjournals.org/highwire/filestream/95295/field_highwire_adjunct_files/0/200790_Supplemental_Data.pdf)
Supplement: 200790_Supplemental_Data.pdf [file 200790_Supplemental_Data.pdf]

**SUPPLEMENTAL TABLE 1.** Image quality evaluation results for all quality categories of each observer, and the respective total mean. Data represent mean values (1 poor, 2 moderate, 3 good and 4 very good).

|                          | <b>Overall judgement</b> |     | <b>Contrast</b>          |     | <b>Sharpness</b>            |     | <b>Artefacts</b>   |      |
|--------------------------|--------------------------|-----|--------------------------|-----|-----------------------------|-----|--------------------|------|
|                          | Observer                 |     | Observer                 |     | Observer                    |     | Observers          |      |
|                          | 1                        | 2   | 1                        | 2   | 1                           | 2   | 1                  | 2    |
| <b>OSEM*</b>             | 3.3                      | 2.9 | 3.6                      | 2.9 | 2.8                         | 2.5 | 3.9                | 3.6  |
| <b>β<sup>†</sup> 133</b> | 3.4                      | 2.3 | 3.9                      | 2.9 | 3.8                         | 2.3 | 3.9                | 3.4  |
| <b>β 267</b>             | 3.5                      | 2.9 | 3.7                      | 3.1 | 3.0                         | 2.5 | 3.9                | 3.6  |
| <b>β 400</b>             | 3.4                      | 2.8 | 3.5                      | 2.8 | 2.7                         | 2.3 | 3.9                | 3.6  |
| <b>β 533</b>             | 3.3                      | 2.9 | 3.5                      | 2.8 | 2.5                         | 2.1 | 3.9                | 3.6  |
|                          | <b>Noise</b>             |     | <b>Liver homogeneity</b> |     | <b>Tumour detectability</b> |     | <b>Total score</b> |      |
|                          | Observer                 |     | Observer                 |     | Observer                    |     | Observer           |      |
|                          | 1                        | 2   | 1                        | 2   | 1                           | 2   | 1                  | 2    |
| <b>OSEM</b>              | 2.9                      | 2.9 | 2.9                      | 2.7 | 3.6                         | 3.6 | 3.01               | 3.15 |
| <b>β 133</b>             | 1.5                      | 2.2 | 1.5                      | 2.0 | 3.6                         | 3.1 | 2.60               | 2.84 |
| <b>β 267</b>             | 2.7                      | 2.6 | 2.7                      | 2.7 | 3.8                         | 3.8 | 3.03               | 3.18 |
| <b>β 400</b>             | 3.4                      | 2.9 | 3.4                      | 3.0 | 3.7                         | 3.8 | 3.03               | 3.23 |
| <b>β 533</b>             | 3.5                      | 3.0 | 3.5                      | 3.1 | 3.7                         | 3.6 | 3.01               | 3.21 |

\*TOF-OSEM with PSF. †BSREM (including TOF and PSF).
